# Supplementary material for: Prediction of renal outcome in Henoch–Schönlein nephritis based on biopsy findings
Source: Springer Nature journal article supplement (doi:10.1007/s00467-019-04415-3), 2019-12-03
Supplement: MOESM1 [file 17463366]

**Article title:** Prediction of renal outcome in Henoch-Schönlein nephritis based on biopsy findings

**Journal:** Pediatric Nephrology

**Author names:** Mikael Koskela, Elisa Ylinen, Helena Autio-Harmainen, Heikki Tokola, Päivi Heikkilä, Jouko Lohi, Hannu Jalanko, Matti Nuutinen, Timo Jahnukainen

**Corresponding author:** Mikael Koskela; Children's Hospital, Pediatric Research Center, University of Helsinki, Helsinki University Hospital, Helsinki, Finland; e-mail address: [mikael.koskela@helsinki.fi](mailto:mikael.koskela@helsinki.fi)

**Table S1. Histologic parameters of the semiquantitative classification (SQC)**

|                                                 | Active or chronic | Scoring                    |
|-------------------------------------------------|-------------------|----------------------------|
| <b>Glomerular parameters</b>                    |                   |                            |
| Lobulation                                      | active            | 0-1 <sup>a</sup>           |
| Mesangial proliferation                         | active            | 0-1 <sup>a</sup>           |
| Crescents                                       |                   |                            |
| cellular                                        | active            | 0-3 <sup>b</sup>           |
| fibrous                                         | chronic           | 0-3 <sup>b</sup>           |
| Adhesions                                       | chronic           | 0-3 <sup>b</sup>           |
| Fibrinous thrombosis                            | active            | 0-3 <sup>b</sup>           |
| Global sclerosis                                | chronic           | 0-3 <sup>b</sup>           |
| Segmental sclerosis                             | chronic           | 0-2 <sup>c</sup>           |
| <b>Tubular parameters</b>                       |                   |                            |
| Thickening of the basement membrane             | chronic           | 0-1 <sup>a</sup>           |
| Complete atrophy                                | chronic           | 0-1 <sup>a</sup>           |
| Tubular dilatation                              | active            | 0-1 <sup>a</sup>           |
| <b>Interstitial parameters</b>                  |                   |                            |
| Fibrosis                                        | chronic           | 0-1 <sup>a</sup>           |
| Inflammation OR periglomerular inflammation     | chronic           | 0-1 <sup>a</sup>           |
| <b>Capillary parameters</b>                     |                   |                            |
| Arteriosclerosis OR arterial inflammation       | chronic           | 0-1 <sup>a</sup>           |
| <b>Focal or diffuse mesangial proliferation</b> |                   | 0 for focal, 1 for diffuse |

<sup>a</sup>0 = absent; 1 = present

<sup>b</sup>0 = 0% of glomeruli affected; 1 = 0-5% of glomeruli affected; 2 = 5-10% of glomeruli affected; 3 = >10% of glomeruli affected

<sup>c</sup>0 = 0% of glomeruli affected; 1 = 0-5% of glomeruli affected; 3 = >5% of glomeruli affected

SQC was originally published in: The ISKDC classification and a new semiquantitative classification for predicting outcomes of Henoch-Schonlein purpura nephritis. *Pediatr Nephrol* 2017; 32: 1201-1209.
