# Supplementary material for: Prediction of renal outcome in Henoch–Schönlein nephritis based on biopsy findings
Source: Springer Nature journal article supplement (doi:10.1007/s00467-019-04415-3), 2019-12-03
Supplement: MOESM4 [file 17463366]

# Figure S3

**Article title:** Prediction of renal outcome in Henoch-Schönlein nephritis based on biopsy findings

**Journal:** Pediatric Nephrology

**Author names:** Mikael Koskela, Elisa Ylinen, Helena Autio-Harminen, Heikki Tokola, Päivi Heikkilä, Jouko Lohi, Hannu Jalanko, Matti Nuutinen, Timo Jahnukainen

**Corresponding author:** Mikael Koskela; Children's Hospital, Pediatric Research Center, University of Helsinki, Helsinki University Hospital, Helsinki, Finland; e-mail address: [mikael.koskela@helsinki.fi](mailto:mikael.koskela@helsinki.fi)

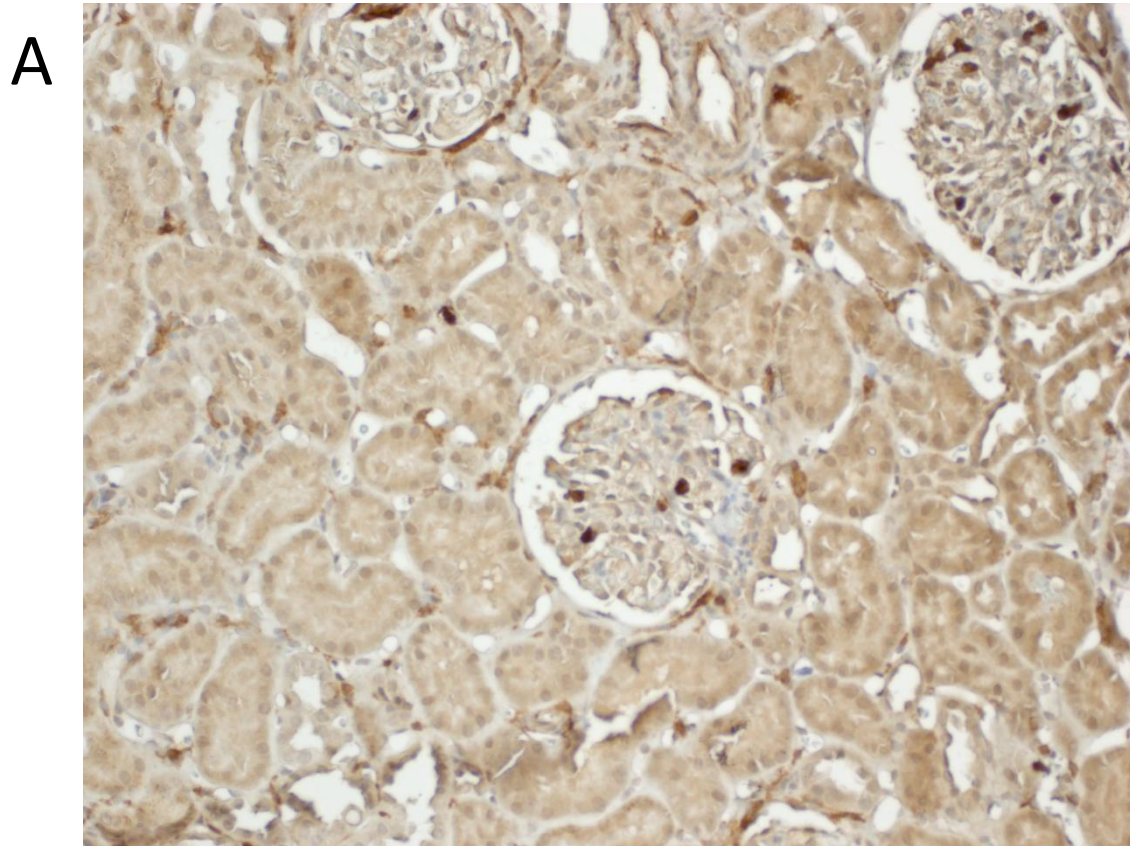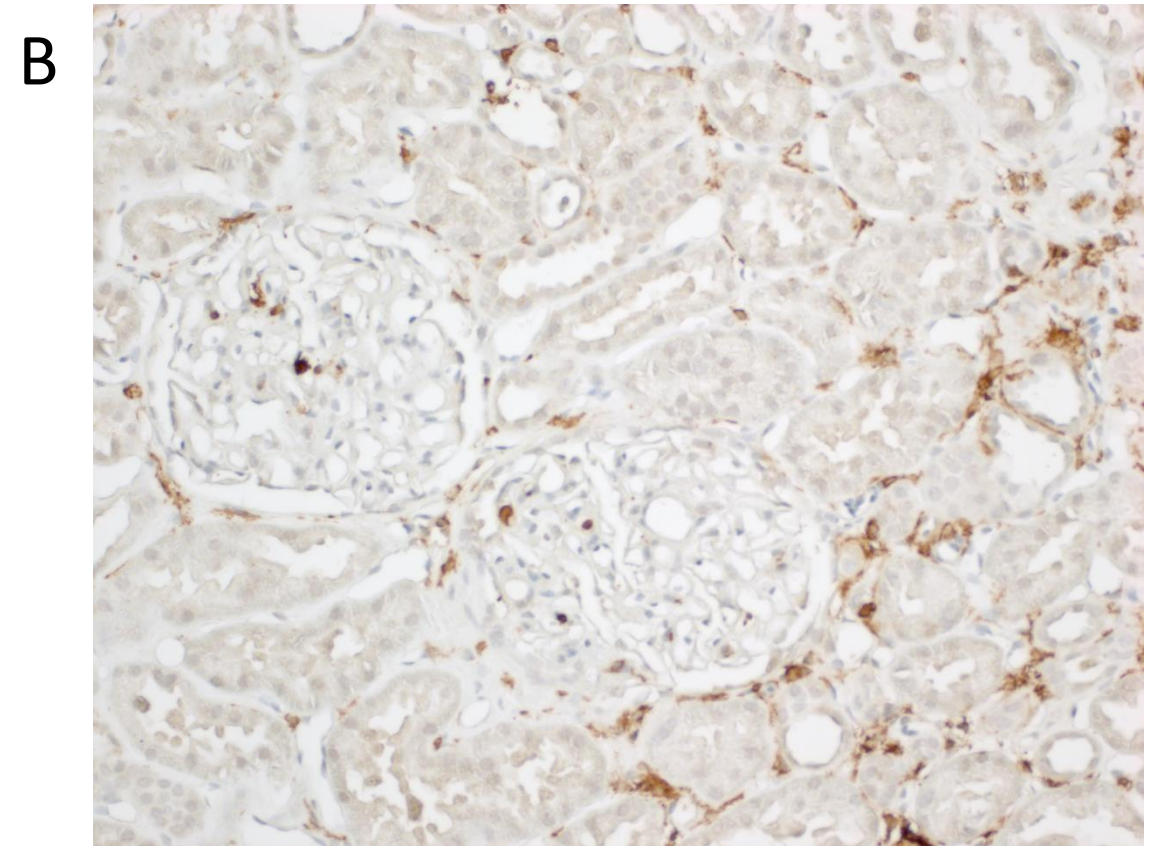

Expression of P-selectin glycoprotein ligand-1 in Henoch-Schönlein nephritis patient (A) and in control specimen (B)
