# Supplementary material for: Prediction of renal outcome in Henoch–Schönlein nephritis based on biopsy findings
Source: Springer Nature journal article supplement (doi:10.1007/s00467-019-04415-3), 2019-12-03
Supplement: MOESM5 [file 17463366]

**Article title:** Prediction of renal outcome in Henoch-Schönlein nephritis based on biopsy findings

**Journal:** Pediatric Nephrology

**Author names:** Mikael Koskela, Elisa Ylinen, Helena Autio-Harmainen, Heikki Tokola, Päivi Heikkilä, Jouko Lohi, Hannu Jalanko, Matti Nuutinen, Timo Jahnukainen

**Corresponding author:** Mikael Koskela; Children's Hospital, Pediatric Research Center, University of Helsinki, Helsinki University Hospital, Helsinki, Finland; e-mail address:

[mikael.koskela@helsinki.fi](mailto:mikael.koskela@helsinki.fi)

**Table S2** Clinical characteristics and biopsy findings in patients with favorable and unfavorable outcome

|                                                               | <b>Favorable outcome (n=21)</b> | <b>Unfavorable outcome (n=5)</b> | <b>p-value</b> |
|---------------------------------------------------------------|---------------------------------|----------------------------------|----------------|
| <b>At the diagnostic biopsy</b>                               |                                 |                                  |                |
| Age (years)                                                   | 9.3 ± 3.4                       | 11.7 ± 2.5                       | 0.14           |
| Plasma creatinine (µmol/L)                                    | 52 (45 – 56)                    | 56 (48 – 88)                     | 0.31           |
| eGFR (mL/min/1.73m <sup>2</sup> )                             | 98 (88 – 109)                   | 99 (65 – 101)                    | 0.57           |
| dU-Prot <sup>a</sup> (g/day)                                  | 2.5 (1.1 – 5.4)                 | 10.4 (9.9 – 12.4)                | 0.004          |
| Nephrotic-range proteinuria (>40 mg/h/m <sup>2</sup> ), n (%) | 15 (71%)                        | 5 (100%)                         | 0.30           |
| ISKDC                                                         |                                 |                                  |                |
| I                                                             | 0                               | 0                                |                |
| II                                                            | 6                               | 0                                |                |
| IIIa                                                          | 5                               | 0                                |                |
| IIIb                                                          | 9                               | 3                                |                |
| IV                                                            | 1                               | 1                                |                |
| V                                                             | 0                               | 1                                |                |
| SQC activity score                                            | 4 (2 – 5)                       | 8 (7 – 8)                        | 0.003          |
| SQC chronicity score                                          | 3 (1 – 4)                       | 4 (4 – 4)                        | 0.096          |
| SQC tubulointerstitial score                                  | 0 (0 – 1)                       | 1 (1 – 2)                        | 0.028          |
| MEST-C <sup>b</sup>                                           |                                 |                                  |                |
| M1, n (%)                                                     | 5 (26%)                         | 3 (60%)                          | 0.29           |
| E1, n (%)                                                     | 15 (79%)                        | 5 (100%)                         | 0.54           |
| S1, n (%)                                                     | 7 (37%)                         | 2 (40%)                          | >0.99          |
| T1-2, n (%)                                                   | 0                               | 0                                | NA             |
| T>0%, n (%)                                                   | 1 (5%)                          | 0                                | >0.99          |
| C1, n (%)                                                     | 9 (47%)                         | 0                                | 0.12           |
| C2, n (%)                                                     | 2 (11%)                         | 4 (80%)                          | 0.006          |
| C1-2, n (%)                                                   | 11 (58%)                        | 4 (80%)                          | 0.62           |
| Total MEST-C score                                            | 2 (2 – 3)                       | 4 (3 – 5)                        | 0.043          |
| <b>At the follow-up biopsy</b>                                |                                 |                                  |                |
| Age (years)                                                   | 12.2 ± 4.6                      | 14.4 ± 4.6                       | 0.31           |
| Plasma creatinine (µmol/L)                                    | 54 (40 – 61)                    | 87 (79 – 192)                    | <0.001         |
| eGFR (mL/min/1.73m <sup>2</sup> )                             | 101 (94 – 123)                  | 65 (28 – 76)                     | <0.001         |
| dU-Prot <sup>c</sup> (g/day)                                  | 0.2 (0.1 – 0.3)                 | 4.7 (3.3 – 8.2)                  | <0.001         |

|                                                                                   |                  |                  |        |
|-----------------------------------------------------------------------------------|------------------|------------------|--------|
| ISKDC                                                                             |                  |                  |        |
| I                                                                                 | 1                | 0                |        |
| II                                                                                | 15               | 1                |        |
| IIIa                                                                              | 2                | 1                |        |
| IIIb                                                                              | 3                | 1                |        |
| IV                                                                                | 0                | 1                |        |
| V                                                                                 | 0                | 1                |        |
| SQC activity score                                                                | 1 (1 – 2)        | 5 (4 – 6)        | 0.015  |
| Decreased activity score from the diagnostic to follow-up biopsy, n (%)           | 16 (76%)         | 5 (100%)         | 0.55   |
| SQC chronicity score                                                              | 7 (4 – 8)        | 10 (9 – 11)      | 0.008  |
| Increased chronicity score from the diagnostic to follow-up biopsy, n (%)         | 17 (81%)         | 5 (100%)         | 0.56   |
| SQC tubulointerstitial score                                                      | 3 (1 – 3)        | 3 (3 – 4)        | 0.062  |
| Increased tubulointerstitial score from the diagnostic to follow-up biopsy, n (%) | 16 (76%)         | 5 (100%)         | 0.55   |
| MEST-C <sup>b</sup>                                                               |                  |                  |        |
| M1, n (%)                                                                         | 6 (32%)          | 2 (40%)          | >0.99  |
| E1, n (%)                                                                         | 1 (5%)           | 2 (40%)          | 0.099  |
| S1, n (%)                                                                         | 14 (74%)         | 5 (100%)         | 0.54   |
| T1-2, n (%)                                                                       | 1 (5%)           | 2 (40%)          | 0.099  |
| T>0%, n (%)                                                                       | 11 (58%)         | 5 (100%)         | 0.13   |
| C1, n (%)                                                                         | 2 (11%)          | 3 (60%)          | 0.042  |
| C2, n (%)                                                                         | 0                | 1 (20%)          | 0.21   |
| C1-2, n (%)                                                                       | 2 (11%)          | 4 (80%)          | 0.006  |
| Total MEST-C score                                                                | 1 (1 – 2)        | 4 (3 – 4)        | 0.009  |
| <b>At the last follow-up</b>                                                      |                  |                  |        |
| Age (years)                                                                       | 18.7 ± 6.5       | 21.0 ± 7.8       | 0.61   |
| Follow-up (years)                                                                 | 8.6 (6.8 – 10.5) | 9.0 (5.8 – 13.2) | 0.95   |
| Plasma creatinine (µmol/L)                                                        | 71 (57 – 75)     | 361 (158 – 450)  | <0.001 |
| eGFR (mL/min/1.73m <sup>2</sup> )                                                 | 88 (83 – 102)    | 14 (12 – 38)     | 0.001  |

Note. Statistical difference was tested with either Fisher's exact test or Mann Whitney U test.

eGFR, estimated glomerular filtration rate; dU-Prot, daily urine protein excretion; ISKDC, International Study of Kidney Disease in Children; SQC, semiquantitative classification; M, mesangial hypercellularity; E, endocapillary proliferation; S, segmental glomerulosclerosis; T, tubular atrophy and/or interstitial fibrosis; C, crescents; NA, not applicable

<sup>a</sup>n=25

<sup>b</sup>n=24

<sup>c</sup>n=21
